1 **Accessibility of care and experiential quality of care for adults with hypertension in**  
2 **rural Burkina Faso: results from a cross-sectional household survey**

3 **Authors**

4 Stephanie Lacey,<sup>1\*</sup> Maria Lisa Odland,<sup>1</sup> Ali Sié,<sup>2</sup> Guy Harling,<sup>3-6</sup> Till Bärnighausen,<sup>7</sup> Pascal  
5 Geldsetzer,<sup>8</sup> Lisa R Hirschhorn<sup>9,10</sup> and Justine I Davies<sup>11</sup>

6 SL:

7 1. Institute of Applied Health Research, University of Birmingham, Birmingham, West  
8 Midlands, UK

9 MLO:

10 1. Institute of Applied Health Research, University of Birmingham, Birmingham, West  
11 Midlands, UK

12 AS:

13 2. Centre de Recherche en Santé de Nouna, Nouna, Burkina Faso

14 GH:

15 3. Institute for Global Health, University College London, London, UK

16 4. MRC/Wits Rural Public Health & Health Transitions Research Unit (Agincourt), University  
17 of the Witwatersrand, Johannesburg-Braamfontein, South Africa

18 5. Africa Health Research Institute, KwaZulu-Natal, South Africa

19 6. University of KwaZulu-Natal, Durban, South Africa

20 TB:

21 7. Heidelberg Institute of Global Health, University of Heidelberg, Heidelberg, Germany

22 PG:

**NOTE: This preprint reports new research that has not been certified by peer review and should not be used to guide clinical practice.**

23 8. Department of Global Health and Population, Harvard T.H. Chan School of Public  
24 Health, Boston, Massachusetts, United States of America

25 LRH:

26 9. Department of Medical Social Science, Northwestern University Feinberg School of  
27 Medicine, Chicago, United States of America

28 10. Robert J Havey Institute of Global Health, Northwestern University Feinberg School of  
29 Medicine, Chicago, United States of America

30 JID:

31 1. Institute of Applied Health Research, University of Birmingham, Birmingham, West  
32 Midlands, UK

33

34 † Indicates equal contribution

35 \*Corresponding author

36 Email: [stephanie.lacey@doctors.org.uk](mailto:stephanie.lacey@doctors.org.uk) (SL)

37

38

39 **Abstract**

40 Providing quality healthcare is essential to reduce the future burden of cardiovascular disease.  
41 We assessed the quality of hypertension care in Burkina Faso using the Institute of Medicine  
42 (IOM) Quality Domains of effectiveness, timeliness of access, patient-centredness and  
43 equitability of care.

44 We performed an analysis of cross-sectional household survey data collected from a  
45 population-representative sample of 4000 adults  $\geq 40$  years in Nouna, Burkina Faso in 2018.  
46 For people with hypertension, effectiveness was assessed through the construction of care  
47 cascades describing the proportion who were screened, diagnosed, treated, and achieved  
48 hypertension control; timeliness was defined as access to care within the last 3 months.  
49 Patient-centredness was described using experiential quality process and outcome measures  
50 (dichotomised as higher [score above the median] or lower quality [score below and including  
51 the median]); a shared understanding and decision-making variable (SUDM) was also  
52 described. Equity was assessed for effectiveness, timeliness, and patient-centredness in  
53 multivariable analyses, including socio-demographic factors. In total, 1006 participants with  
54 hypertension were included. Hypertension prevalence was 34.8%, with 62.3% having  
55 previously been screened, 42.9% diagnosed, 15.0% treated, and 6.8% having controlled  
56 disease; 26.8% had accessed care within the last three months. Overall, 61.8% of participants  
57 had a positive view of the health service. Clarity of communication and opinion of medical  
58 provider knowledge were the best-rated experiential quality process variables, with 40.1% and  
59 39.7% of participants' responses indicating higher quality care respectively. The mean SUDM  
60 score was 68.5 ( $\pm 10.8$ ) out of 100.0. Regarding equity, screening was higher in females, adults  
61 with any education, those who were married or cohabiting, and those in the higher wealth  
62 quintiles. There were no associations seen between SUDM and participant characteristics.

63 Although prevalence of hypertension was high in this population, quality of care was not  
64 commensurate, with room for improvement in all four of the IOM Domains assessed.

## 65 **Introduction**

66 Hypertension is the leading preventable cause of cardiovascular disease (CVD) and  
67 premature mortality globally [1, 2]. A 2019 campaign that screened over 1.5 million adults from  
68 92 countries worldwide estimated the prevalence of hypertension to be 34.0% [3]. Whilst the  
69 prevalence of hypertension is beginning to plateau or decrease in high-income countries  
70 (HICs), it is increasing in low- and middle-income countries (LMICs) [4]. As a result, the burden  
71 of disease disproportionately affects LMICs, with 80% of CVD-related deaths occurring in  
72 these settings [5].

73 As a chronic disease, hypertension management requires patients to receive longitudinal  
74 quality care through the health system. However, simply being able to access care is not  
75 synonymous with receiving high-quality healthcare. Poor-quality care can lead to  
76 underutilisation or boycotting of formal health services as well as delays in access to care and  
77 is recognised as a key driver of preventable mortality [6-9]. Effective care for hypertension  
78 requires appropriate case-finding by screening for hypertension; ensuring people with  
79 hypertension have a formal diagnosis; offering effective treatment and counselling; and follow-  
80 up to monitor blood pressure control, adjust medications, and provide additional support as  
81 needed. However, multiple studies in LMICs show low awareness, treatment, and disease  
82 control [10]. Equity in access to effective hypertension care and achievement of equitable  
83 patient outcomes remains a key challenge globally [9,11,12].

84 A key determinant of whether patients remain in care and follow advice is patient-centredness,  
85 which describes care that is responsive to patient's preferences, needs and values whilst  
86 ensuring patients are involved in decisions about their care [13, 14]. Larson et al. suggests  
87 that both process and outcome indicators should be used in determining patient-centredness  
88 of care and define the experience of care as a process indicator reflecting the interpersonal  
89 components of care received, with patient satisfaction, confidence in the health system, and  
90 met need as the outcome indicators of patient-centred care [15]. The responsiveness of care  
91 experience can be measured by asking patients to report their experiences of care

92 (experiential quality) and assessing factors such as dignity, autonomy, confidentiality, and  
93 choice [14]. Results from surveys conducted in 49 LMICs from 2007–2017 found that on  
94 average 34% of people from LMICs reported poor care experiences [9]. Shared decision-  
95 making is also an increasingly recognised important component of responsive care requiring  
96 collaboration between healthcare workers and patients in making decisions about disease  
97 management [14, 16, 17]. Higher-rated shared understanding and decision making (SUDM)  
98 has been associated with greater trust and confidence in health services, as well as met need  
99 [6].

100 Burkina Faso is a small, landlocked country located in Western Africa. It is a low-income  
101 country, ranking 184<sup>th</sup> out of 191 countries based on the Human Development Index [18].  
102 Burkina Faso is undergoing a demographic transition, with increases in life expectancy and  
103 falling birth rates resulting in a rapidly growing population [19, 20]. Ischaemic heart disease is  
104 the fifth leading cause of death in Burkina Faso, only to be surpassed by malaria, respiratory  
105 infections, neonatal disorders and diarrheal diseases [20]. The WHO Stepwise approach to  
106 Surveillance (STEPS) survey conducted in 2013, estimated the prevalence of hypertension  
107 was 18.0% (95% CI: 16.2–20.0) [21]. Despite this high prevalence, little is known about the  
108 quality of care for hypertension in Burkina Faso. Yet, to ensure that the population receives  
109 the chronic disease management needed for this condition requires understanding of the  
110 current status of care provided.

111 This analysis of cross-sectional data aimed to determine the quality of care for hypertension  
112 in a rural region of Burkina Faso based on selected healthcare quality domains of the United  
113 States Institute of Medicine (IOM) (now called the National Academy of Medicine) [13]. The  
114 main objectives were, i) to describe the population prevalence of hypertension; and ii) to  
115 describe the quality of hypertension care in terms of the IOMs domains of effectiveness,  
116 timeliness of access, patient-centredness, and equitability of access to effective, timely and  
117 patient-centred care.

118

## 119 **Methodology**

### 120 **Study setting**

121 This study was set in a predominantly rural area of Burkina Faso and based in the Nouna  
122 Health and Demographic Surveillance System (HDSS) area, which consists of the market  
123 town and 58 surrounding villages encompassing a total population of 124,947 people. Farming  
124 constitutes the majority of economic activity in the region.

### 125 **Data collection**

126 The HDSS is led by the Centre de Recherche en Santé de Nouna (CRSN). The CRSN  
127 partnered with the Heidelberg Institute of Global Health to conduct the CRSN Heidelberg  
128 Aging Study (CHAS). CHAS consisted of a cross-sectional household survey in 2018 of adults  
129  $\geq 40$  years old living in the Nouna HDSS to explore health needs and health service utilisation  
130 of older adults living in Burkina Faso. Data collection methods are discussed in full elsewhere  
131 [22]. In brief, a stratified random population-representative sample of 4000 adults  $\geq 40$  years  
132 was obtained. Age-eligible participants were identified from the 2015 HDSS population  
133 census. In villages with more than 90 adults  $\geq 40$  years old, a random sample of households  
134 was generated, and one eligible adult was randomly selected from each selected household  
135 to participate. In villages with fewer than 90 eligible adults, all households with an adult  $\geq 40$   
136 years were included. Data collection was conducted in participants' homes between 28<sup>th</sup> May  
137 and 16<sup>th</sup> July 2018 by trained data collectors. Written informed consent was obtained by study  
138 participants. In the case that the study participant was non-literate, the consent form was read  
139 to the participant and a thumbprint and literate witness was used to record consent. Interviews  
140 were conducted in French or another local language, and responses were recorded  
141 electronically on tablet devices using Open Data Kit Software.

### 142 **Definition of variables**

143 *Demographic and disease characteristics*

144 Age was used as a continuous variable. Education level was characterised as none or any  
145 education. Marital status was categorised as married/cohabiting or  
146 single/separated/divorced/widowed. Household wealth was based on household assets and  
147 categorised in quintiles using the principal component method of Filmer and Pritchett. We  
148 included body mass index (BMI) in our analysis, given the hypothesised confounding effect of  
149 this variable on the relationships between wealth and access to and experienced quality of  
150 care [23]. BMI in kg/m<sup>2</sup> was used to create categories of underweight (<18.5) normal weight  
151 (18.5 to 24.9), overweight (25.0-29.9), and obese (≥30.0). Hypertension was defined as a self-  
152 reported diagnosis of hypertension, and/or current receipt of treatment for hypertension,  
153 and/or investigator-measured systolic blood pressure (BP) ≥140 mmHg or diastolic blood  
154 pressure ≥90 mmHg.

#### 155 *Quality of hypertension care*

156 Data were available to enable assessment of four of the IOM domains of quality healthcare:  
157 effectiveness, timeliness, patient centredness, and equitability. Data were not available to  
158 assess safety or efficiency of care.

159 Effectiveness of care was assessed through the construction of a care cascade. The prevalent  
160 population is the population defined as living with hypertension; screening was defined as the  
161 % of the population with prevalent hypertension who had ever had their BP measured;  
162 diagnosis was defined as the % of the population with prevalent hypertension who had ever  
163 been told they have hypertension; treatment was defined as the % of the population with  
164 prevalent hypertension who were currently taking medication for hypertension; control was  
165 defined as the % of the population with prevalent hypertension whose BP measured by study  
166 investigators was <140/90mmHg, as defined by the World Health Organisations Package of  
167 Essential Non-communicable disease (NCD) interventions (WHO PEN) [24]. Entry into the  
168 following step of the cascade was contingent on having achieved the previous one. The  
169 approach used in this study follows the same methodology used elsewhere [10, 25, 26].  
170 Guidelines in Burkina Faso, state that people with hypertension should be in contact with the

171 health services at least once every three months. Therefore, timeliness of access to care was  
172 described as the population with prevalent hypertension who attended a healthcare facility at  
173 least once in the last three months.

174 Patient-centredness of care was described using six experiential quality process variables, a  
175 composite of the SUDM variable, and three health system quality outcome variables. The six  
176 experiential quality process variables were: clarity of communication; ease of following  
177 instructions; opinion of medical providers knowledge and skills; trust in medical providers skills  
178 and abilities; involvement in decision making; and affordability of care. Following methodology  
179 described elsewhere [6], the SUDM variable was created as a composite using four variables  
180 which had the greatest factor loading in factorial analysis (clarity of communication, opinion of  
181 providers knowledge and skills, trust in medical providers skills and abilities, and involvement  
182 in decision making), and which the study investigators felt reflected the components necessary  
183 for SUDM. The three health system quality outcome variables were: met need from last visit;  
184 confidence in the health system; and overall view of the health system.

185 Equitability of access to effective, timely, and patient-centred care was defined as care that  
186 did not vary based upon a participant's sociodemographic characteristics which relate to equity  
187 (gender, age, education level, marital status, household wealth).

## 188 **Analysis**

189 Results for continuous variables are described as mean (standard deviation [SD]) and range  
190 when normally distributed or median (and interquartile range [IQR]) when skewed. Categorical  
191 variables are presented as proportions. Complete case analysis was performed for all  
192 analyses.

193 For timeliness, we describe the proportion of the population with prevalent hypertension who  
194 attended a healthcare facility in the past 3 months. Given that experience of care varies with  
195 the context, we described experiential quality process variables and health system quality  
196 outcome variables based on relative ratings, with higher-quality care defined as being a



197 response above the median value for each variable and values below or equal to the median  
198 defined as lower-quality care. To identify the median value for each variable, histograms were  
199 drawn to identify the median response. The experiential quality process and health system  
200 quality outcome variables were then recoded to create the binary higher- and lower-quality  
201 care responses. For those people with hypertension who had ever accessed care, quality of  
202 care was described as the proportion of participants with hypertension that reported higher-  
203 quality care at their last visit versus the proportion that reported lower-quality care at last visit.  
204 The composite measure SUDM was described using mean (SD). A subgroup exploratory  
205 analysis of patient-centredness of care (including experiential quality process variables,  
206 SUDM, and health system quality outcome variables) was performed including only the  
207 participants that accessed care in the last three months.

208 Multivariable analysis was done using binary logistic or linear regression, with dependent  
209 variables in each model as progress through the cascade, timeliness, or patient centredness  
210 variables. For each dependent variable two sequential models were performed. Model 1  
211 adjusted for age, gender, education level, marital status, and wealth quintile; model 2 adjusted  
212 for the same variables as model 1 with the addition of BMI. Multicollinearity of independent  
213 variables was assessed by calculating the variance inflation factor (VIF). The VIF was <5 for  
214 all independent variables indicating a low likelihood of collinearity.

215 A p value of  $\leq 0.05$  was taken as representing statistical significance. All analyses were  
216 performed using STATA version 17.0.

## 217 **Ethical considerations**

218 Ethical approval for the primary analysis was given from the Ethics Commission I (medical  
219 facility Heidelberg [S-120/2018]), the Burkina Faso Comité d’Ethique pour la Recherche en  
220 Santé (2018-4-045) and the Institutional Ethics Committee of the CRSN (2018-04). Written  
221 informed consent was provided by study participants and verbal approval was granted from

222 village elders. The detection of undiagnosed hypertension in study participants led to a referral  
 223 to an appropriate health service supported by provision of funds for transportation.

224 **Results**

225 In total, 3028 adults aged  $\geq 40$  years consented to participate in CHAS, of these, 2887 (95.3%)  
 226 participants had complete data available (S1 Fig and S2 Fig). Of participants with  
 227 hypertension, 91.8% (N=1006) had complete data available and were included in analyses.  
 228 The prevalence of hypertension in people who had complete data was 34.8%. The  
 229 sociodemographic characteristics of the prevalent hypertension population are show in Table  
 230 1.

231 **Table 1. Characteristics of the population with hypertension.**

|                   |                                             | Overall population with hypertension<br>N=1006 |
|-------------------|---------------------------------------------|------------------------------------------------|
| Parameter         | Group                                       | N (%)                                          |
| Gender            | Male                                        | 458 (45.5)                                     |
|                   | Female                                      | 548 (54.5)                                     |
| Age, median (IQR) | –                                           | 55 (47–64)                                     |
| Education level   | No formal education                         | 845 (84.0)                                     |
|                   | Any education                               | 161 (16.0)                                     |
| Marital status    | Single/divorced/ widowed                    | 292 (29.0)                                     |
|                   | Married/cohabiting                          | 714 (71.0)                                     |
| Wealth quintile   | 1                                           | 199 (19.8)                                     |
|                   | 2                                           | 164 (16.3)                                     |
|                   | 3                                           | 182 (18.1)                                     |
|                   | 4                                           | 213 (21.2)                                     |
|                   | 5                                           | 248 (24.7)                                     |
| BMI*              | Underweight (<18.5 kg/m <sup>2</sup> )      | 142 (14.2)                                     |
|                   | Normal range (18.5-24.9 kg/m <sup>2</sup> ) | 594 (59.3)                                     |
|                   | Overweight (25-29.9 kg/m <sup>2</sup> )     | 178 (17.8)                                     |
|                   | Obese ( $\geq 30$ -kg/m <sup>2</sup> )      | 88 (8.8)                                       |

232  
 233 \*Total population excludes four participants with missing BMI data. BMI, body mass index; IQR, interquartile.  
 234 range; N, number.

235 *Effectiveness of care*

236 Among those with hypertension, 62.3% reported having previously had their blood pressure  
237 tested (screened for hypertension), with 42.9% having received a formal diagnosis, 15.0%  
238 being on treatment, and 6.8% having achieved controlled disease. The greatest loss in the  
239 care cascade occurred at the treatment and control stages, with 65.0% and 55.0% loss,  
240 respectively (Fig 1).

241

242 **Fig 1.** Cascade of care for hypertension. Bars represent the proportion (%) of the disease prevalent population  
243 progressing through each stage of the cascade. Boxes represent the proportion of participants lost at each stage  
244 of the cascade.

245

#### 246 *Timeliness of access to care*

247 In total, 269 (26.8%) participants with hypertension sought care from a healthcare facility in  
248 the last three months (S1 Table).

#### 249 *Patient-centredness of care*

250 Of those with hypertension, 934 (92.8%) had complete visit and experience of care responses.  
251 Experiential quality was categorised as higher quality in 11.1% of participants for ease of  
252 following instructions, in 40.1% of participants for clarity of communication, in 27.2% of  
253 participants for involvement in treatment, in 11.5% of participants for trust in skills and abilities  
254 of healthcare workers, and in 39.7% of participants for opinion of medical provider knowledge  
255 and skills. In total, 12.3% of participants had to borrow or sell something to pay for care. The  
256 mean SUDM score was 68.5 ( $\pm 10.8$ ) out of a possible 100 (Table 2).

257 **Table 2. Patient-centredness of care for adults with hypertension.**

| Measure                                             | Rating      | N (%)      | Binary rating  | N (%)      |
|-----------------------------------------------------|-------------|------------|----------------|------------|
| Ease of following instructions*                     | Very easy** | 104 (11.1) | Higher quality | 104 (11.1) |
|                                                     | Easy        | 692 (74.1) | Lower quality  | 830 (88.9) |
|                                                     | Fair        | 115 (12.3) |                |            |
|                                                     | Hard        | 21 (2.2)   |                |            |
|                                                     | Very hard   | 2 (0.2)    |                |            |
| Clarity of communication*                           | Excellent** | 57 (6.1)   | Higher quality | 375 (40.1) |
|                                                     | Very good** | 318 (34.0) |                |            |
|                                                     | Good        | 515 (55.1) | Lower quality  | 559 (59.9) |
|                                                     | Fair        | 41 (4.4)   |                |            |
|                                                     | Poor        | 3 (0.3)    |                |            |
| Involvement in treatment decisions*                 | Excellent** | 40 (4.3)   | Higher quality | 254 (27.2) |
|                                                     | Very good** | 214 (22.9) |                |            |
|                                                     | Good        | 472 (50.5) | Lower quality  | 680 (72.8) |
|                                                     | Fair        | 129 (13.8) |                |            |
|                                                     | Poor        | 79 (8.5)   |                |            |
| Trust in skills and abilities of healthcare worker* | Very much** | 107 (11.5) | Higher quality | 107 (11.5) |
|                                                     | Quite a bit | 619 (66.3) | Lower quality  | 827 (88.5) |
|                                                     | Some        | 188 (20.1) |                |            |
|                                                     | Very little | 19 (2.0)   |                |            |

|                                                                           |                                                  |             |                |            |
|---------------------------------------------------------------------------|--------------------------------------------------|-------------|----------------|------------|
|                                                                           | Not at all                                       | 1 (0.1)     |                |            |
| Opinion of medical provider knowledge and skills*                         | Excellent**                                      | 68 (7.3)    | Higher quality | 371 (39.7) |
|                                                                           | Very good**                                      | 303 (32.4)  |                |            |
|                                                                           | Good                                             | 514 (55.0)  | Lower quality  | 563 (60.3) |
|                                                                           | Fair                                             | 44 (4.7)    |                |            |
|                                                                           | Poor                                             | 5 (0.5)     |                |            |
| Shared understanding and decision making* (SUDM)<br>(Range 25.0 to 100.0) | Mean (sd)                                        | 68.5 (10.8) |                |            |
| Borrowed or sold anything to pay for healthcare*                          | Yes                                              | 115 (12.3)  |                |            |
|                                                                           | No                                               | 819 (87.7)  |                |            |
| Overall, how well did received care meet health needs at last visit†      | Excellent**                                      | 80 (8.6)    | Higher quality | 415 (44.5) |
|                                                                           | Very good**                                      | 335 (35.9)  |                |            |
|                                                                           | Good                                             | 457 (49.0)  | Lower quality  | 517 (55.5) |
|                                                                           | Fair                                             | 49 (5.3)    |                |            |
|                                                                           | Poor                                             | 11 (1.2)    |                |            |
| Confidence that would receive effective treatment if very sick tomorrow†  | Very confident**                                 | 297 (31.9)  | Higher quality | 297 (31.9) |
|                                                                           | Somewhat confident                               | 567 (60.8)  | Lower quality  | 635 (68.1) |
|                                                                           | Not very confident                               | 62 (6.7)    |                |            |
|                                                                           | Not at all confident                             | 6 (0.6)     |                |            |
| Overall view of national health care system†                              | Only minor changes needed to healthcare system** | 576 (61.8)  | Higher quality | 576 (61.8) |

|  |                                           |            |               |            |
|--|-------------------------------------------|------------|---------------|------------|
|  | Major changes needed to healthcare system | 324 (34.8) | Lower quality | 356 (38.2) |
|  | Need to rebuild healthcare system         | 32 (3.4)   |               |            |

258

259 \*Total population with hypertension included in the experiential quality analysis is 934 participants, this excludes those with missing visit or experiential quality data. †Total  
 260 population with hypertension included in the quality care outcomes analysis is 932 participants, this excludes participants with missing visit, experiential quality, and quality  
 261 outcome data. \*\*Indicates responses above the median value and dichotomised as 'higher-quality' for subsequent analyses. N, number; sd, standard deviation.

262

263

264 Of the care quality outcomes, 44.5% of participants with hypertension reported that their need  
265 was met at last visit (excellent or good), 31.9% of participants were very confident if they  
266 became unwell tomorrow, they would receive effective treatment, and 61.8% of participants  
267 had a positive overall view of the health service (Table 2).

268 Of participants who had complete experience of care data available, only 250 (26.8%)  
269 participants had an appointment at a healthcare facility in the last three months and were able  
270 to be included in the subgroup analysis. When limiting the analysis to this subgroup, the  
271 proportion of participants reporting higher-quality care was greater than for those who had  
272 ever accessed care (S2 Table). Except for clarity of communication and need met at last visit,  
273 whereby the proportion of participants reporting higher-quality care were numerically lower in  
274 participants with a recent visit (6.4% and 9.3%, respectively) than in patients who had ever  
275 had a healthcare facility appointment in the more distant past; statistical testing was not done.

#### 276 *Equity*

277 Considering effectiveness of care, in multivariable analyses, the results from model 1 indicated  
278 that participants who were female, had any education, were married or cohabiting, or in wealth  
279 quintiles 3 to 5 were more likely to be screened for hypertension (Table 3). Females were also  
280 more likely to receive a formal diagnosis of hypertension, and females or older adults were  
281 more likely to receive treatment for hypertension. There were no sociodemographic  
282 characteristics associated with disease control. There was an association between being in a  
283 higher wealth quintile and having an increased odds of accessing care within the last three  
284 months, but no other sociodemographic characteristics were associated with timeliness (Table  
285 4).

286 **Table 3. Multivariable association between sociodemographic characteristics and likelihood of progressing through the care cascade**  
 287 **in the population with hypertension (model 1).**

|                 |                         | Screened vs not            |                  | Diagnosed vs not           |              | Treated vs not             |              | Controlled vs not   |         |
|-----------------|-------------------------|----------------------------|------------------|----------------------------|--------------|----------------------------|--------------|---------------------|---------|
|                 |                         | OR                         |                  | OR                         |              | OR                         |              | OR                  |         |
| Parameter       | Group                   | (95% CI)                   | P value          | (95% CI)                   | P value      | (95% CI)                   | P value      | (95% CI)            | P value |
| Gender          | Male                    | Referent                   | –                | Referent                   | –            | Referent                   | –            | Referent            | –       |
|                 | Female                  | <b>1.75 (1.28 to 2.39)</b> | <b>&lt;0.001</b> | <b>1.60 (1.09 to 2.36)</b> | <b>0.017</b> | <b>1.71 (1.06 to 2.74)</b> | <b>0.027</b> | 1.40 (0.62 to 3.16) | 0.411   |
| Age*            |                         | 1.01 (0.99 to 1.02)        | 0.249            | 1.00 (0.99 to 1.02)        | 0.750        | <b>1.03 (1.01 to 1.05)</b> | <b>0.002</b> | 0.99 (0.95 to 1.02) | 0.422   |
| Education level | No formal education     | Referent                   | –                | Referent                   | –            | Referent                   | –            | Referent            | –       |
|                 | Any education           | <b>1.77 (1.14 to 2.73)</b> | <b>0.010</b>     | 0.91 (0.58 to 1.43)        | 0.674        | 1.12 (0.65 to 1.94)        | 0.688        | 1.11 (0.45 to 2.72) | 0.823   |
| Marital status  | Single/divorced/widowed | Referent                   | –                | Referent                   | –            | Referent                   | –            | Referent            | –       |
|                 | Married/cohabiting      | <b>1.58 (1.09 to 2.27)</b> | <b>0.014</b>     | 0.98 (0.61 to 1.58)        | 0.943        | 0.89 (0.52 to 1.52)        | 0.670        | 0.78 (0.33 to 1.86) | 0.575   |
| Wealth quintile | 1                       | Referent                   | –                | Referent                   | –            | Referent                   | –            | Referent            | –       |
|                 | 2                       | 1.53 (0.99 to 2.34)        | 0.053            | 1.35 (0.70 to 2.59)        | 0.372        | 0.65 (0.29 to 1.47)        | 0.301        | 2.31 (0.59 to 9.10) | 0.231   |
|                 | 3                       | <b>1.92 (1.26 to 2.93)</b> | <b>0.002</b>     | 1.16 (0.63 to 2.15)        | 0.640        | 0.54 (0.25 to 1.19)        | 0.125        | 0.54 (0.15 to 2.01) | 0.362   |
|                 | 4                       | <b>2.94 (1.94 to 4.46)</b> | <b>&lt;0.001</b> | 1.30 (0.73 to 2.33)        | 0.376        | 0.91 (0.45 to 1.83)        | 0.783        | 0.46 (0.15 to 1.42) | 0.175   |



|  |   |                             |                  |                     |       |                     |       |                     |       |
|--|---|-----------------------------|------------------|---------------------|-------|---------------------|-------|---------------------|-------|
|  | 5 | <b>6.89 (4.33 to 10.95)</b> | <b>&lt;0.001</b> | 1.54 (0.88 to 2.72) | 0.134 | 1.30 (0.67 to 2.55) | 0.436 | 1.00 (0.36 to 2.78) | 0.996 |
|--|---|-----------------------------|------------------|---------------------|-------|---------------------|-------|---------------------|-------|

288

289 Model 1. Hypertension population includes those identified as hypertensive when examined by a study investigator, those who have previously been told they have  
 290 hypertension and those who are currently taking treatment for hypertension (N=1006). The denominator population at each step of the cascade includes the participants that  
 291 achieved the previous step. For example, the denominator population for the analysis of the association between sociodemographic characteristics and diagnosed vs not, are  
 292 the participants that were screened for hypertension in the previous step of the cascade. \*Age in years, adults aged ≥40 years. CI, confidence interval; OR, odds ratio.

293 **Table 4. Multivariable regression shows the association between odds of timely**  
 294 **access to care (healthcare appointment within the previous 3 months vs not) and**  
 295 **participant characteristics representative of equity.**

296

| Model 1. Overall population with hypertension N=1004* |                          |                            |              |
|-------------------------------------------------------|--------------------------|----------------------------|--------------|
| Parameter                                             | Group                    | OR<br>95% CI               | P value      |
| Gender                                                | Male                     | Referent                   | –            |
|                                                       | Female                   | 1.23 (0.89 to 1.70)        | 0.202        |
| Age <sup>†</sup>                                      | –                        | 1.01 (1.00 to 1.03)        | 0.082        |
| Education level                                       | No formal education      | Referent                   | –            |
|                                                       | Any education            | 1.01 (0.67 to 1.52)        | 0.958        |
| Marital status                                        | Single/divorced/ widowed | Referent                   | –            |
|                                                       | Married/cohabiting       | 0.93 (0.64 to 1.36)        | 0.710        |
| Wealth quintile                                       | 1                        | Referent                   | –            |
|                                                       | 2                        | 1.13 (0.68 to 1.88)        | 0.633        |
|                                                       | 3                        | <b>1.75 (1.09 to 2.82)</b> | <b>0.021</b> |
|                                                       | 4                        | <b>1.73 (1.09 to 2.73)</b> | <b>0.020</b> |
|                                                       | 5                        | <b>1.74 (1.10 to 2.75)</b> | <b>0.018</b> |

306

307 \*Overall population with hypertension excludes two participants with missing visit data. <sup>†</sup>Age in years, adults aged  
 308 ≥40 years. CI, confidence interval; N, number; OR, odds ratio.

309 Considering health system quality outcomes measures in people with hypertension who had  
 310 ever accessed care, people in higher wealth quintiles had greater odds of reporting that the  
 311 system met their needs, but there was no association with other sociodemographic  
 312 characteristic on this outcome, or any sociodemographic variable on confidence in or overall  
 313 view of the healthcare system (Table 5). Results of the multivariable regression to examine  
 314 the relationship between sociodemographic characteristics and experiential quality process  
 315 measures in the population with prevalent hypertension are shown in S3 Table. Any education  
 316 was positively associated with ease of following instructions, being male was associated with

317 higher rating of clarity of communication, increasing age or residing in the 5<sup>th</sup> wealth quintile  
318 were positively associated with involvement in treatment decisions, and increasing wealth was  
319 associated with a reduced odds of having to borrow or sell things to afford care. There were  
320 no associations with any sociodemographic characteristics and SUDM (S4 Table).

321

322 **Table 5. Multivariable regression of the association between sociodemographic characteristics of participants with prevalent**  
 323 **hypertension and health system quality outcomes.**

|                  |                                 | Model 1 (N=932)*           |              |                                            |         |                                        |         |
|------------------|---------------------------------|----------------------------|--------------|--------------------------------------------|---------|----------------------------------------|---------|
|                  |                                 | Reported met need          |              | Trust and confidence in health care system |         | Overall view of the health care system |         |
| Parameter        | Group                           | OR (95% CI)                | P value      | OR (95% CI)                                | P value | OR (95% CI)                            | P value |
| Gender           | Male                            | Referent                   | –            | Referent                                   | –       | Referent                               | –       |
|                  | Female                          | 0.97 (0.72 to 1.30)        | 0.827        | 0.75 (0.55 to 1.02)                        | 0.065   | 0.75 (0.56 to 1.01)                    | 0.059   |
| Age <sup>†</sup> | –                               | 1.00 (0.99 to 1.01)        | 0.802        | 0.99 (0.98 to 1.01)                        | 0.341   | 0.99 (0.98 to 1.01)                    | 0.362   |
| Education level  | No formal education             | Referent                   | –            | Referent                                   | –       | Referent                               | –       |
|                  | Any education                   | 1.01 (0.70 to 1.46)        | 0.948        | 0.96 (0.65 to 1.41)                        | 0.833   | 0.81 (0.56 to 1.17)                    | 0.260   |
| Marital status   | Single/<br>divorced/<br>widowed | Referent                   | –            | Referent                                   | –       | Referent                               | –       |
|                  | Married/<br>cohabiting          | 1.00 (0.70 to 1.42)        | 0.997        | 1.21 (0.82 to 1.79)                        | 0.331   | 0.85 (0.59 to 1.21)                    | 0.367   |
| Wealth quintile  | 1                               | Referent                   | –            | Referent                                   | –       | Referent                               | –       |
|                  | 2                               | 1.44 (0.91 to 2.27)        | 0.119        | 0.93 (0.56 to 1.54)                        | 0.767   | 0.98 (0.62 to 1.56)                    | 0.940   |
|                  | 3                               | <b>1.56 (1.00 to 2.42)</b> | <b>0.050</b> | 1.03 (0.64 to 1.68)                        | 0.881   | 1.02 (0.65 to 1.60)                    | 0.928   |
|                  | 4                               | 1.37 (0.89 to 2.09)        | 0.149        | 1.44 (0.91 to 2.27)                        | 0.117   | 0.93 (0.61 to 1.43)                    | 0.745   |
|                  | 5                               | <b>1.92 (1.26 to 2.93)</b> | <b>0.002</b> | 1.43 (0.91 to 2.25)                        | 0.117   | 0.86 (0.56 to 1.31)                    | 0.486   |

324 \*Overall hypertension population (N=932) excludes participant with missing visit data, experiential quality data and quality care outcomes data. <sup>†</sup>Age in years, adults aged ≥40

325 years. CI, confidence interval; N, number. OR, odds ratio.

326 Results for the exploratory analysis of associations between markers of equity and  
327 experiences of care in the subgroup of participants with hypertension who sought care within  
328 the last three months are shown in S5–S7 Table. In brief, residing in the 5<sup>th</sup> wealth quintile  
329 was associated with a lower rating of clarity of communication. There were no other significant  
330 associations between patient-centredness measures and participant characteristics in the  
331 subgroup analysis. Adding BMI into the models in the subgroup analysis did not change the  
332 results. Except for opinion of medical provider knowledge and skills, whereby increasing age  
333 was associated with higher rated quality of care in this domain.

334 Adding BMI to the models assessing equity of effectiveness, timeliness, and patient  
335 centredness for the main analysis in the prevalent hypertension population did not  
336 substantially change the results (S3 Table, S4 Table, S8–S10 Table). Being female was no  
337 longer associated with increased likelihood of receiving treatment for hypertension. Residing  
338 in the 3<sup>rd</sup> wealth quintile was no longer associated with reported met need. Residing in the 5<sup>th</sup>  
339 wealth quintile was associated with a higher rating of trust and confidence in the health system.

## 340 **Discussion**

341 In this study, the prevalence of hypertension among adults aged over 40 was high (34.8%),  
342 yet within the range of earlier estimates for hypertension in Burkina Faso, ranging from 18.0–  
343 40.2% [21, 27, 28] and sub-Saharan Africa [25, 29–32]. However, it is worth noting that  
344 earlier estimates in Burkina Faso included younger populations. Particularly the study by  
345 Soubeiga et al. 2017, which included adults aged 25–64 years and found the overall  
346 population prevalence to be 18.0% but as high as 37.3% in adults aged 55–64 years [21]. In  
347 a population with relatively low levels of overweight and obesity compared with many  
348 Western countries [33], the high prevalence of hypertension could be attributed to dietary  
349 behaviours related to salt intake. Salt intake is a key modifiable risk factor for hypertension  
350 and a recent study in Sierra Leone found the prevalence of behaviours such as adding salt  
351 at the table or during cooking and eating salty snacks was high in adults  $\geq 40$  years [34].

352 We found that the effectiveness of care, as assessed by progression through the care  
353 cascade, was low with substantial dropout at the treatment and disease control stages. In  
354 adults with hypertension, we found high levels of inequity in being screened at the first step  
355 in the cascade, with females, educated adults, married or cohabiting adults, and adults with  
356 higher household wealth all more likely to have reached this stage. Specifically, adults in the  
357 highest wealth quintile were almost seven times more likely to be screened than adults in the  
358 lowest wealth quintile. Whilst women remained more likely than men to have received a  
359 diagnosis and be on treatment, progression through other stages of the care cascade was  
360 similar in the other socio-demographic categories, with the exception that older adults were  
361 more likely to be on treatment for hypertension.

362 The fact that females are more likely to access and receive care for health conditions,  
363 including hypertension, has been described previously in high-, middle- and low-income  
364 countries [10, 25, 35]. Poor engagement and retention of men in healthcare could be due to  
365 the historic emphasis within global health on women's health, particularly sexual and  
366 reproductive health needs [36]. The gender equity gap in health service utilisation and need  
367 to understand male health-seeking behaviour being increasingly recognised [36]. Unlike in  
368 some previous studies, we saw no significant association of marital status, education, or  
369 wealth with progression through the cascade beyond being screened [12, 25]. This may be  
370 due to the lower number of participants in our study and the loss of power with transitioning  
371 through the cascade. However, these associations have been inconsistently shown in other  
372 studies, leaving open the possibility that the lack of association reflected reality [12, 25].

373 Timely access to care in this study sample fell below national recommendations of access to  
374 care for people with hypertension, with only one-quarter of participants with hypertension  
375 accessing the healthcare service in the last three months. Lack of timely access to care for  
376 hypertension has been shown elsewhere in sub-Saharan Africa. In Tanzania, only 34% of  
377 adults with hypertension who were advised to seek healthcare attended a health facility in  
378 the subsequent 12 months [37]. In Sierra Leone, access to healthcare in the last three

379 months for patients with CVD or CVD risk factors was low [25]. Infrequent engagement with  
380 healthcare services is problematic for hypertension management, which requires continuity  
381 of care including long-term medication adherence and follow up to prevent or delay  
382 complications including CVD events. Described barriers to accessing care are vast and  
383 include health system factors and patient-related factors, highlighting a need for context-  
384 specific exploration of barriers to care from the perspective of the patient and provider to  
385 develop effective interventions [38, 39].

386 Affordability is an identified barrier to access to care and adherence to medication for  
387 hypertension [39]. In LMICs, the cost of healthcare can drain household income and may  
388 keep households in poverty as other necessities are foregone to pay for care. While we did  
389 not measure out of pocket expenses or financial burden, in our study sample the proportion  
390 of people with hypertension who ever accessed care who had to borrow or sell something in  
391 order to pay for a care episode was relatively small. Although wealth was associated with  
392 timeliness of access to care.

393 Continuity of care is essential to the effective management of NCDs. Whilst we did not  
394 assess continuity of care at the individual level, the low rates of progression at each stage of  
395 the care cascade and low proportion of participants adhering to local visit frequency  
396 guidelines suggests that continuity of care in this population was low. Novel approaches are  
397 being studied in LMICs such as the integration of NCD management into primary care which  
398 aims to strengthen primary care capability to manage multiple NCDs [40]. Other work is  
399 exploring integration of NCD management into other programmes to improve  
400 comprehensiveness, coordination, and people centredness. For example, integrating  
401 hypertension screening and treatment into HIV clinics [41], although HIV is not a common  
402 condition in our population.

403 Whereas effectiveness of care and timeliness of access to care can be measured  
404 objectively, experiential quality is more subjective. Research has shown that including these  
405 measures is critical to increase the voice of the patient in order to understand where

406 improvement may be needed to increase retention in and success with longitudinal care for  
407 managing NCDs including hypertension [9]. Ratings of experiential quality measures will in  
408 part be influenced by cultural norms and expectations of care and thus creates an added  
409 challenge in interpreting responses. A low proportion of participants reported receipt of high-  
410 quality care for the experiential quality process and most outcome measures suggesting a  
411 need to improve the overall experience of care. The mean SUDM score in our study was  
412 68.5 ( $\pm 10.8$ ) out of a possible 100. Another study which used the same dataset as in our  
413 study but included all participants who had accessed care (not limited to adults with  
414 hypertension), reported similar responses to care quality including SUDM [6]. The composite  
415 SUDM measure has not been used in any further studies to allow comparison of results.  
416 Improving patient experience of care is important as poor prior experiences of care can  
417 influence subsequent healthcare seeking behaviour [42]. In our study although the overall  
418 view of the health service was favourable, other experiential quality process measures  
419 suggest an underlying need to improve the quality of healthcare visits; meeting this need  
420 may improve the proportion of people accessing care in a timely manner in the future.

421 We found some inequity in experiential quality. Mostly related to wealth, with those people  
422 with more assets having less need to borrow or sell anything to access care and greater  
423 involvement in treatment decisions. It is possible that people who are wealthier may be  
424 treated differently to their less wealthy counterparts or are more empowered to engage in  
425 decision making, but this hypothesis requires further explanation.

426 The World Hypertension League has proposed an ambition goal to be achieved by all  
427 African countries by 2030, which is that 80% of adults with hypertension should be  
428 diagnosed, 80% of those diagnosed (64% of hypertensive adults in total) should be on  
429 treatment and 80% of treated patients should have controlled disease [43]. They suggest a  
430 multi-dimensional approach to raise awareness, diagnosis and treatment of hypertension  
431 which involves action at a national policy level, healthcare provider and local community  
432 level. Our study results would suggest that the greatest gains in effectiveness of care would



433 be to prioritise constrained resource on increasing the proportion of adults with diagnosed  
434 hypertension who are on treatment and have controlled disease. Whilst this approach  
435 focuses resource on a smaller cohort of adults with recognised hypertension and does not  
436 address the inequities of access to care further upstream, it at least has an impact on  
437 improving the CVD risk of some patients and hence future healthcare burden of CVD.  
438 Solutions to achieve this could include procuring low-cost single pill drug combinations,  
439 offering multi-month pill refills for those with stable disease, increasing access to at home  
440 blood pressure monitoring, and decentralising healthcare and upskilling community health  
441 workers in hypertension management [43]. The latter may also enhance timeliness of access  
442 to care for hypertension and reduce the time and financial burden for obtaining care. In  
443 addition to this, there are some potentially low-cost population-level interventions aimed at  
444 reducing dietary salt intake that could help reduce the population prevalence of  
445 hypertension. These approaches include, introducing regulations setting legal limits on  
446 added salt to processed food; introducing regulations on food labelling to include salt, sugar,  
447 and fat content per serving; and campaigns to raise public awareness of the importance of  
448 salt reduction [43]. In addition, improving identification of adults with hypertension could be  
449 enhanced through making blood pressure monitoring routine in all healthcare appointments  
450 and moving towards integrating care for multiple NCDs into single clinics to improve access  
451 [43].

452 Our study had a number of limitations. First, participants were labelled as having  
453 hypertension following a blood pressure measurement at a single encounter, whereas a  
454 clinical diagnosis requires raised BP at two consecutive healthcare visits. Similarly, we relied  
455 on self-report of prior diagnosis or being on treatment. Both issues may have led to an under  
456 or over reporting of diagnosed hypertension. However, these methods are often employed in  
457 epidemiological studies, such as ours [10, 25]. Not all the domains of quality care or patient-  
458 centredness could be explored due to limitations in the survey data collection. Similarly,  
459 understanding other aspects related to quality of care such as availability of medicines and

460 adherence were not included in this analysis. The small proportion of adults that received  
461 treatment or achieved disease control provided limited power to determine the relationship  
462 between experiential quality and progression in the care cascade. Similarly, the sample size  
463 of participants that sought care in the last three months was small and thus the results from  
464 the subgroup analysis should be interpreted with caution. Further, recall bias may have  
465 impacted the responses from those that didn't access care recently leading to a more  
466 positive recollection of the care experience. We did not use anchoring vignettes to adjust for  
467 how quality is rated differently in different countries based on prior experiences, norms and  
468 expectations of care [44]. Responses to the experience of care at last visit were not specific  
469 to appointments for hypertension due to the low number of participants who reported that the  
470 visit was for hypertension.

471

## 472 **Conclusion**

473 We found that quality of care for hypertension as determined by the Institute of Medicine  
474 domains of effectiveness, timeliness, patient-centredness, and equity in this population  
475 residing in rural Burkina Faso was low. Given that both technical and experiential quality  
476 care is recognised as being a central component of improving health outcomes, this study  
477 contributes to the global literature showing the breadth and depth of issues with quality care  
478 experienced in some low-income country settings.

479

## 480 **Acknowledgements**

481 This research was funded in whole, or in part, by the Wellcome Trust [210479/Z/18/Z]. For  
482 the purpose of open access, the author has applied a CC BY public copyright licence to any  
483 Author Accepted Manuscript version arising from this submission.

## 484 **Contributors**

485 TB, AS and GH conceived and designed the overall CSRN CHAS study. GH and AS co-  
486 ordinated baseline data collection and preparation. JID, PG contributed to the design of the  
487 CSRN CHAS household survey. JID designed the current study. SL conducted the analysis,  
488 wrote and revised the manuscript. JID, LRH and MLO supervised the analysis, write up and  
489 development of the manuscript. All authors reviewed manuscript, inputted into revisions and  
490 approved the final manuscript.

#### 491 **Funding**

492 Support for the CRSN Heidelberg Aging Study and for TB was provided by the Alexander  
493 von Humboldt Foundation through the Alexander von Humboldt Professor award to Till  
494 Bärnighausen, funded by the German Federal Ministry of Education and Research. GH is  
495 supported by a fellowship from the Wellcome Trust and Royal Society [grant number  
496 210479/Z/18/Z].

#### 497 **References**

- 498 1. GBD 2017 Risk Factor Collaborators. Global, regional, and national comparative risk  
499 assessment of 84 behavioural, environmental and occupational, and metabolic risks  
500 or clusters of risks for 195 countries and territories, 1990–2017: A systematic  
501 analysis for the Global Burden of Disease Study 2017. *Lancet*. 2018;392: 1923-1994.
- 502 2. Mills KT, Stefanescu A, He J. The global epidemiology of hypertension. *Nat Rev*  
503 *Nephrol*. 2020;16: 223-237.
- 504 3. Beaney T, Schutte AE, Stergiou GS, Borghi C, Burger D, Charchar F, et al. May  
505 Measurement Month 2019: The Global Blood Pressure Screening Campaign of the  
506 International Society of Hypertension. *Hypertension*. 2020;76: 333-341.
- 507 4. Mills KT, Bundy JD, Kelly TN, Reed JE, Kearney PM, Reynolds K, et al. Global  
508 Disparities of Hypertension Prevalence and Control: A Systematic Analysis of  
509 Population-Based Studies From 90 Countries. *Circulation*. 2016;134: 441-450.

- 510 5. Doulogou B, Kouanda S, Ouédraogo GH, Meda BI, Bado A, Zunzunegui MV.  
511 Awareness, treatment, control of hypertension and utilization of health care services  
512 following screening in the North-central region of Burkina Faso. *Pan Afr Med J*.  
513 2014;19: 259.
- 514 6. Goldberg EM, Bountogo M, Harling G, Baernighausen T, Davies JI, Hirschhorn LR.  
515 Older persons experiences of healthcare in rural Burkina Faso: Results of a cross  
516 sectional household survey. *PLoS Glob Public Health*. 2022;2: e0000193.
- 517 7. Ratcliffe HL, Bell G, Awoonor-Williams K, Bitton A, Kim JH, Lipstiz S, et al. Towards  
518 patient-centred care in Ghana: health system responsiveness, self-rated health and  
519 experiential quality in a nationally representative survey. *BMJ Open Quality*. 2020;9:  
520 e000886.
- 521 8. Baltussen RM, Yé Y, Haddad S, Sauerborn RS. Perceived quality of care of primary  
522 health care services in Burkina Faso. *Health Policy Plan*. 2002;17: 42-48.
- 523 9. Kruk ME, Gage AD, Arsenault C, Jordan K, Leslie HH, Roder-DeWan S, et al. High-  
524 quality health systems in the Sustainable Development Goals era: time for a  
525 revolution. *Lancet Glob Health*. 2018;6: e1196-e1252.
- 526 10. Geldsetzer P, Manne-Goehler J, Marcus E, Ebert C, Zhumadilov Z, Wesseh CS, et  
527 al. The state of hypertension care in 44 low-income and middle-income countries: a  
528 cross-sectional study of nationally representative individual-level data from 1·1 million  
529 adults. *The lancet*. 2019;394: 652-662.
- 530 11. Colvin CL, Kalejaiye A, Ogedegbe G, Commodore-Mensah Y. Advancing Equity in  
531 Blood Pressure Control: A Response to the Surgeon General's Call-to-Action. *Am J*  
532 *Hypertens*. 2022;35: 217-224.
- 533 12. Prenissl J, Manne-Goehler J, Jaacks LM, Prabhakaran D, Awasthi A, Bishops AC,  
534 et al. Hypertension screening, awareness, treatment, and control in India: A  
535 nationally representative cross-sectional study among individuals aged 15 to 49  
536 years. *PLoS Med*. 2019;3: e1002801.

- 537 13. Agency for Healthcare Research and Quality. Six Domains of Healthcare Quality.  
538 Available from: <https://www.ahrq.gov/talkingquality/measures/six-domains.html>
- 539 14. Darby C, Valentine N, Murray CJL, de Silva A. World Health Organization (WHO):  
540 Strategy on Measuring Responsiveness. 2003.  
541 [https://www.researchgate.net/publication/268295796\\_World\\_Health\\_Organization\\_W](https://www.researchgate.net/publication/268295796_World_Health_Organization_WHO_Strategy_on_Measuring_Responsiveness)  
542 [HO\\_Strategy\\_on\\_Measuring\\_Responsiveness](https://www.researchgate.net/publication/268295796_World_Health_Organization_WHO_Strategy_on_Measuring_Responsiveness)
- 543 15. Larson E, Sharma J, Bohren MA, Tunçalp Ö. When the patient is the expert:  
544 measuring patient experience and satisfaction with care. Bull World Health Organ.  
545 2019;97: 563-569.
- 546 16. Stigelbout AM, Pieterse AH, De Haes JC. Shared decision making: Concepts,  
547 evidence, and practice. Patient Educ Couns. 2015;98: 1172-9.
- 548 17. National Institute for Health and Care Excellence. Shared decision making. Available  
549 from: [https://www.nice.org.uk/about/what-we-do/our-programmes/nice-guidance/nice-](https://www.nice.org.uk/about/what-we-do/our-programmes/nice-guidance/nice-guidelines/shared-decision-making)  
550 [guidelines/shared-decision-making](https://www.nice.org.uk/about/what-we-do/our-programmes/nice-guidance/nice-guidelines/shared-decision-making).
- 551 18. Human Development Reports. Burkina Faso. Available from:  
552 <https://hdr.undp.org/data-center/specific-country-data#/countries/BFA>.
- 553 19. World Population Review. Burkina Faso Population. Available from:  
554 <https://worldpopulationreview.com/countries/burkina-faso-population>.
- 555 20. Institute for Health Metrics and Evaluation. Burkina Faso. Available from:  
556 <https://www.healthdata.org/research-analysis/health-by-location/profiles/burkina-faso>
- 557 21. Soubeiga JK, Millogo T, Bicaba, BW, Doulogou B, Kouanda S. Prevalence and  
558 factors associated with hypertension in Burkina Faso: a countrywide cross-sectional  
559 study. BMC Public Health. 2017;17.
- 560 22. Odland ML, Payne C, Witham MD, Siedner MJ, Barnighausen T, Bountogo M, et al.  
561 Epidemiology of multimorbidity in conditions of extreme poverty: a population-based  
562 study of older adults in rural Burkina Faso. BMJ Glob Health. 2020;5: e002096.

- 563 23. Haregu TN, Mohamed SF, Muthuri S, Khayeka-Wandabwa C, Kyobutungi C. Body  
564 mass index and wealth index: positively correlated indicators of health and wealth  
565 inequalities in Nairobi slums. *Glob Health Epidemiol Genom.* 2018;3: e11.
- 566 24. World Health Organization. WHO PEN Protocol 1 Prevention of Heart Attacks,  
567 Strokes and Kidney Disease through Integrated Management of Diabetes and  
568 Hypertension (Best Buy). Available from:  
569 [https://extranet.who.int/ncdccs/Data/TON\\_D1\\_Protocol%201-](https://extranet.who.int/ncdccs/Data/TON_D1_Protocol%201-%20%20Prevention%20of%20Heart%20Attacks,%20Strokes%20and%20Kidney%20Disease.pdf)  
570 [%20%20Prevention%20of%20Heart%20Attacks,%20Strokes%20and%20Kidney%20](https://extranet.who.int/ncdccs/Data/TON_D1_Protocol%201-%20%20Prevention%20of%20Heart%20Attacks,%20Strokes%20and%20Kidney%20Disease.pdf)  
571 [Disease.pdf](https://extranet.who.int/ncdccs/Data/TON_D1_Protocol%201-%20%20Prevention%20of%20Heart%20Attacks,%20Strokes%20and%20Kidney%20Disease.pdf).
- 572 25. Odland ML, Bockarie T, Wurie H, Ansumana R, Lamin J, Nugent R, et al. Prevalence  
573 and access to care for cardiovascular risk factors in older people in Sierra Leone: a  
574 cross-sectional survey. *BMJ Open.* 2020;10: e038520.
- 575 26. Manne-Goehler J, Geldsetzer P, Agoudavi K, Andall-Brereton G, Aryal KK, Bicaba  
576 BW, et al. Health system performance for people with diabetes in 28 low- and middle-  
577 income countries: A cross-sectional study of nationally representative surveys. *PLoS*  
578 *Med.* 2019;16: e1002751.
- 579 27. Niakara A, Fournet F, Gary J, Harang M, Nébié LV, Salem G. Hypertension,  
580 urbanization, social and spatial disparities: a cross-sectional population-based survey  
581 in a West African urban environment (Ouagadougou, Burkina Faso). *Trans R Soc*  
582 *Trop Med Hyg.* 2007;101: 1136-42.
- 583 28. Rossier C, Soura AB, Duthé G, Findley S. Non-Communicable Disease Mortality and  
584 Risk Factors in Formal and Informal Neighborhoods, Ouagadougou, Burkina Faso:  
585 Evidence from a Health and Demographic Surveillance System. *PLoS One.* 2014;9:  
586 e113780.
- 587 29. Bosu WK, Bosu DK. Prevalence, awareness and control of hypertension in Ghana: A  
588 systematic review and meta-analysis. *PLoS One.* 2021;16: e0248137.
- 589 30. Bosu, WK. Epidemic of hypertension in Ghana: a systematic review. *BMC Public*  
590 *Health.* 2010;10.

- 591 31. Adeloye D, Basquill C. Estimating the Prevalence and Awareness Rates of  
592 Hypertension in Africa: A Systematic Analysis. PLoS One. 2014;9: e104300.
- 593 32. Tannor EK, Nyarko OO, Adu-Boakye Y, Owusu Konadu S, Opoku G, Ankobea-  
594 Kokroe F, et al. Prevalence of Hypertension in Ghana: Analysis of an Awareness and  
595 Screening Campaign in 2019. Clin Med Insights Cardiol. 2022;16:  
596 11795468221120092.
- 597 33. UK Parliament House of Commons Library. Obesity Statistics. Available from:  
598 [https://commonslibrary.parliament.uk/research-  
599 briefings/sn03336/#:~:text=Adult%20obesity%20in%20England,BMI\)%20of%2030%20  
600 or%20above.](https://commonslibrary.parliament.uk/research-briefings/sn03336/#:~:text=Adult%20obesity%20in%20England,BMI)%20of%2030%20or%20above.)
- 601 34. Bockarie T, Odland M, Wurie H, Ansumana R, Lamin J, Witham M, et al. Prevalence  
602 and socio-demographic associations of diet and physical activity risk-factors for  
603 cardiovascular disease in Bo, Sierra Leone. BMC Public Health. 2021;21.
- 604 35. Baker P. Men's health: an overlooked inequality. Br J Nurs. 2016;25: 1054-1057.
- 605 36. Beia T, Kielmann K, Diaconu K. Changing men or changing health systems? A  
606 scoping review of interventions, services and programmes targeting men's health in  
607 sub-Saharan Africa. Int J Equity Health. 2021; 20.
- 608 37. Bovet P, Gervasoni JP, Mkamba M, Balampama M, Lengeler C, Paccaud F. Low  
609 utilization of health care services following screening for hypertension in Dar es  
610 Salaam (Tanzania): a prospective population-based study. BMC Public Health.  
611 2008;8.
- 612 38. Mishra P, Vamadevan AS, Roy A, Bhatia R, Naik N, Singh S, et al. Exploring Barriers  
613 to Medication Adherence Using COM-B Model of Behaviour Among Patients with  
614 Cardiovascular Diseases in Low- and Middle-Income Countries: A Qualitative Study.  
615 Patient Prefer Adherence. 2021;15: 1359-1371.
- 616 39. Khatib R, Schwalm JD, Yusuf S, Haynes RB, McKee M, Khan M, et al. Patient and  
617 healthcare provider barriers to hypertension awareness, treatment and follow up: a

- 618 systematic review and meta-analysis of qualitative and quantitative studies. PLoS  
619 One. 2014;9: e84238.
- 620 40. Tapela NM, Tshisimogo G, Shatera BP, Letsatsi V, Gaborone M, Madidimalo T, et al.  
621 Integrating noncommunicable disease services into primary health care, Botswana.  
622 Bull World Health Organ. 2019;97.
- 623 41. Mitambo C, Khan S, Matanje-Mwagomba BL, Kachimanga C, Wroe E, Segula D, et  
624 al. Improving the screening and treatment of hypertension in people living with HIV:  
625 An evidence-based policy brief by Malawi's Knowledge Translation Platform. Malawi  
626 Med J. 2017;29: 224-228.
- 627 42. Ivynian SE, Ferguson C, Newton PJ, DiGiacomo M. Factors influencing care-seeking  
628 delay or avoidance of heart failure management: A mixed-methods study. Int J Nurs  
629 Stud. 2020;108: 103603.
- 630 43. Parati G, Lackland DT, Campbel NRC, Owolabi MO, Bavuma C, Beheiry HM, et al.  
631 How to Improve Awareness, Treatment, and Control of Hypertension in Africa, and  
632 How to Reduce Its Consequences: A Call to Action From the World Hypertension  
633 League. Hypertension. 2022;79: 1949-1961.
- 634 44. Roder-DeWan S, Gage AD, Hirschhorn LR, Twum-Danso NAY, Liljestrand J, Asante-  
635 Shongwe K, et al. Expectations of healthcare quality: A cross-sectional study of  
636 internet users in 12 low- and middle-income countries. PloS Med. 2019; 16:  
637 e1002879.

638

639

#### 640 **Supporting information captions**

641 **S1 Fig. Consort diagram for analysis model 1.** Model 1 did not include body mass index  
642 (BMI) in the multivariable analysis and thus includes participants with missing BMI data.



643 **S2 Fig. Consort diagram for analysis model 2.** Model 2 includes body mass index (BMI)  
644 in the multivariable analysis and thus removes participants with missing BMI data.

645 **S1 Table. Description of the sociodemographic characteristics of participants with**  
646 **hypertension by timeliness of last attendance to a health facility.** \*Overall population  
647 with hypertension excludes two participants with missing health facility visit data. †BMI  
648 excludes the four participants with missing BMI data. BMI, body mass index; IQR,  
649 interquartile range; N, number.

650 **S2 Table. Patient-centredness of care for adults with hypertension that visited a**  
651 **health facility in the last 3 months (N=250).** \*Above median values which equate to the  
652 'higher quality' binary value. †One participant excluded for missing quality outcome data. N,  
653 number; sd, standard deviation.

654 **S3 Table. Multivariable regression to determine the association between participant**  
655 **characteristics and experience of care in the prevalent hypertension population.** Model  
656 1, prevalent hypertension population (N=934) excludes participants with missing visit or  
657 experiential quality data. Model 2 consists of the same population as model 1 except the four  
658 participants with missing body mass index data were removed. \*Age in years, adults aged  
659  $\geq 40$  years. BMI, body mass index; CI, confidence interval; N, number; OR, odds ratio.

660 **S4 Table. Multivariable regression shows the odds of a higher shared understanding**  
661 **and decision making (SUDM) in participants with hypertension dependent on**  
662 **participant characteristics.** Model 1, prevalent hypertension population (N=934) excludes  
663 participants with missing visit or experiential quality data. Model 2 consists of the same  
664 population as model 1 except the four participants with missing body mass index data were  
665 removed. \*Age in years, adults aged  $\geq 40$  years. BMI, body mass index; CI, confidence  
666 interval; N, number.

667 **S5 Table. Multivariable regression to determine the association between participant**  
668 **characteristics and experience of care in the prevalent hypertension population who**

669 **attended a healthcare facility in the last 3 months.** Model 2 excludes one participant with  
670 missing BMI data. \*Age in years, adults aged  $\geq 40$  years. †27 participants dropped from  
671 analysis. BMI, body mass index; CI, confidence interval; N, number; OR, odds ratio.

672 **S6 Table. Multivariable regression to determine the association between participant**  
673 **characteristics and shared understanding and decision making in participants with**  
674 **hypertension who attended a healthcare facility in the last 3 months.** Model 2 excludes  
675 one participant with missing BMI data. \*Age in years, adults aged  $\geq 40$  years. BMI, body  
676 mass index; CI, confidence interval; N, number.

677 **S7 Table. Multivariable regression to show the association between health system**  
678 **quality outcomes and participant sociodemographic characteristics in participants**  
679 **with hypertension that accessed care in the last 3 months.** \*Model 1 and model 2  
680 exclude one participant with missing health system quality outcome data. †Age in years,  
681 adults aged  $\geq 40$  years. \*\*27 participants dropped from reported met need analysis. BMI,  
682 body mass index; CI, confidence interval; N, number. OR, odds ratio.

683 **S8 Table. Multivariable association between sociodemographic characteristics and**  
684 **likelihood of progressing through the care cascade (model 2).** Model 2 excludes  
685 participants with missing BMI data. \*Age in years, adults aged  $\geq 40$  years. BMI, body mass  
686 index; CI, confidence interval; N, number; OR, odds ratio.

687 **S9 Table. Multivariable regression shows the association between odds of timely**  
688 **access to care (healthcare appointment within the previous 3 months vs not) and**  
689 **participant characteristics representative of equity (model 2).** \*Overall population with  
690 hypertension excludes four participants with missing BMI data. †Age in years, adults aged  
691  $\geq 40$  years. BMI, body mass index; CI, confidence interval; N, number; OR, odds ratio.

692 **S10 Table. Multivariable regression to show the association between health system**  
693 **quality outcomes and participant sociodemographic characteristics in participants**  
694 **with hypertension regardless of timeliness of access to care (model 2).** \*Two

695 participants excluded due to missing health system quality outcome data. †Age in years,  
696 adults aged  $\geq 40$  years. BMI, body mass index; CI, confidence interval; N, number; OR, odds  
697 ratio.

698

700

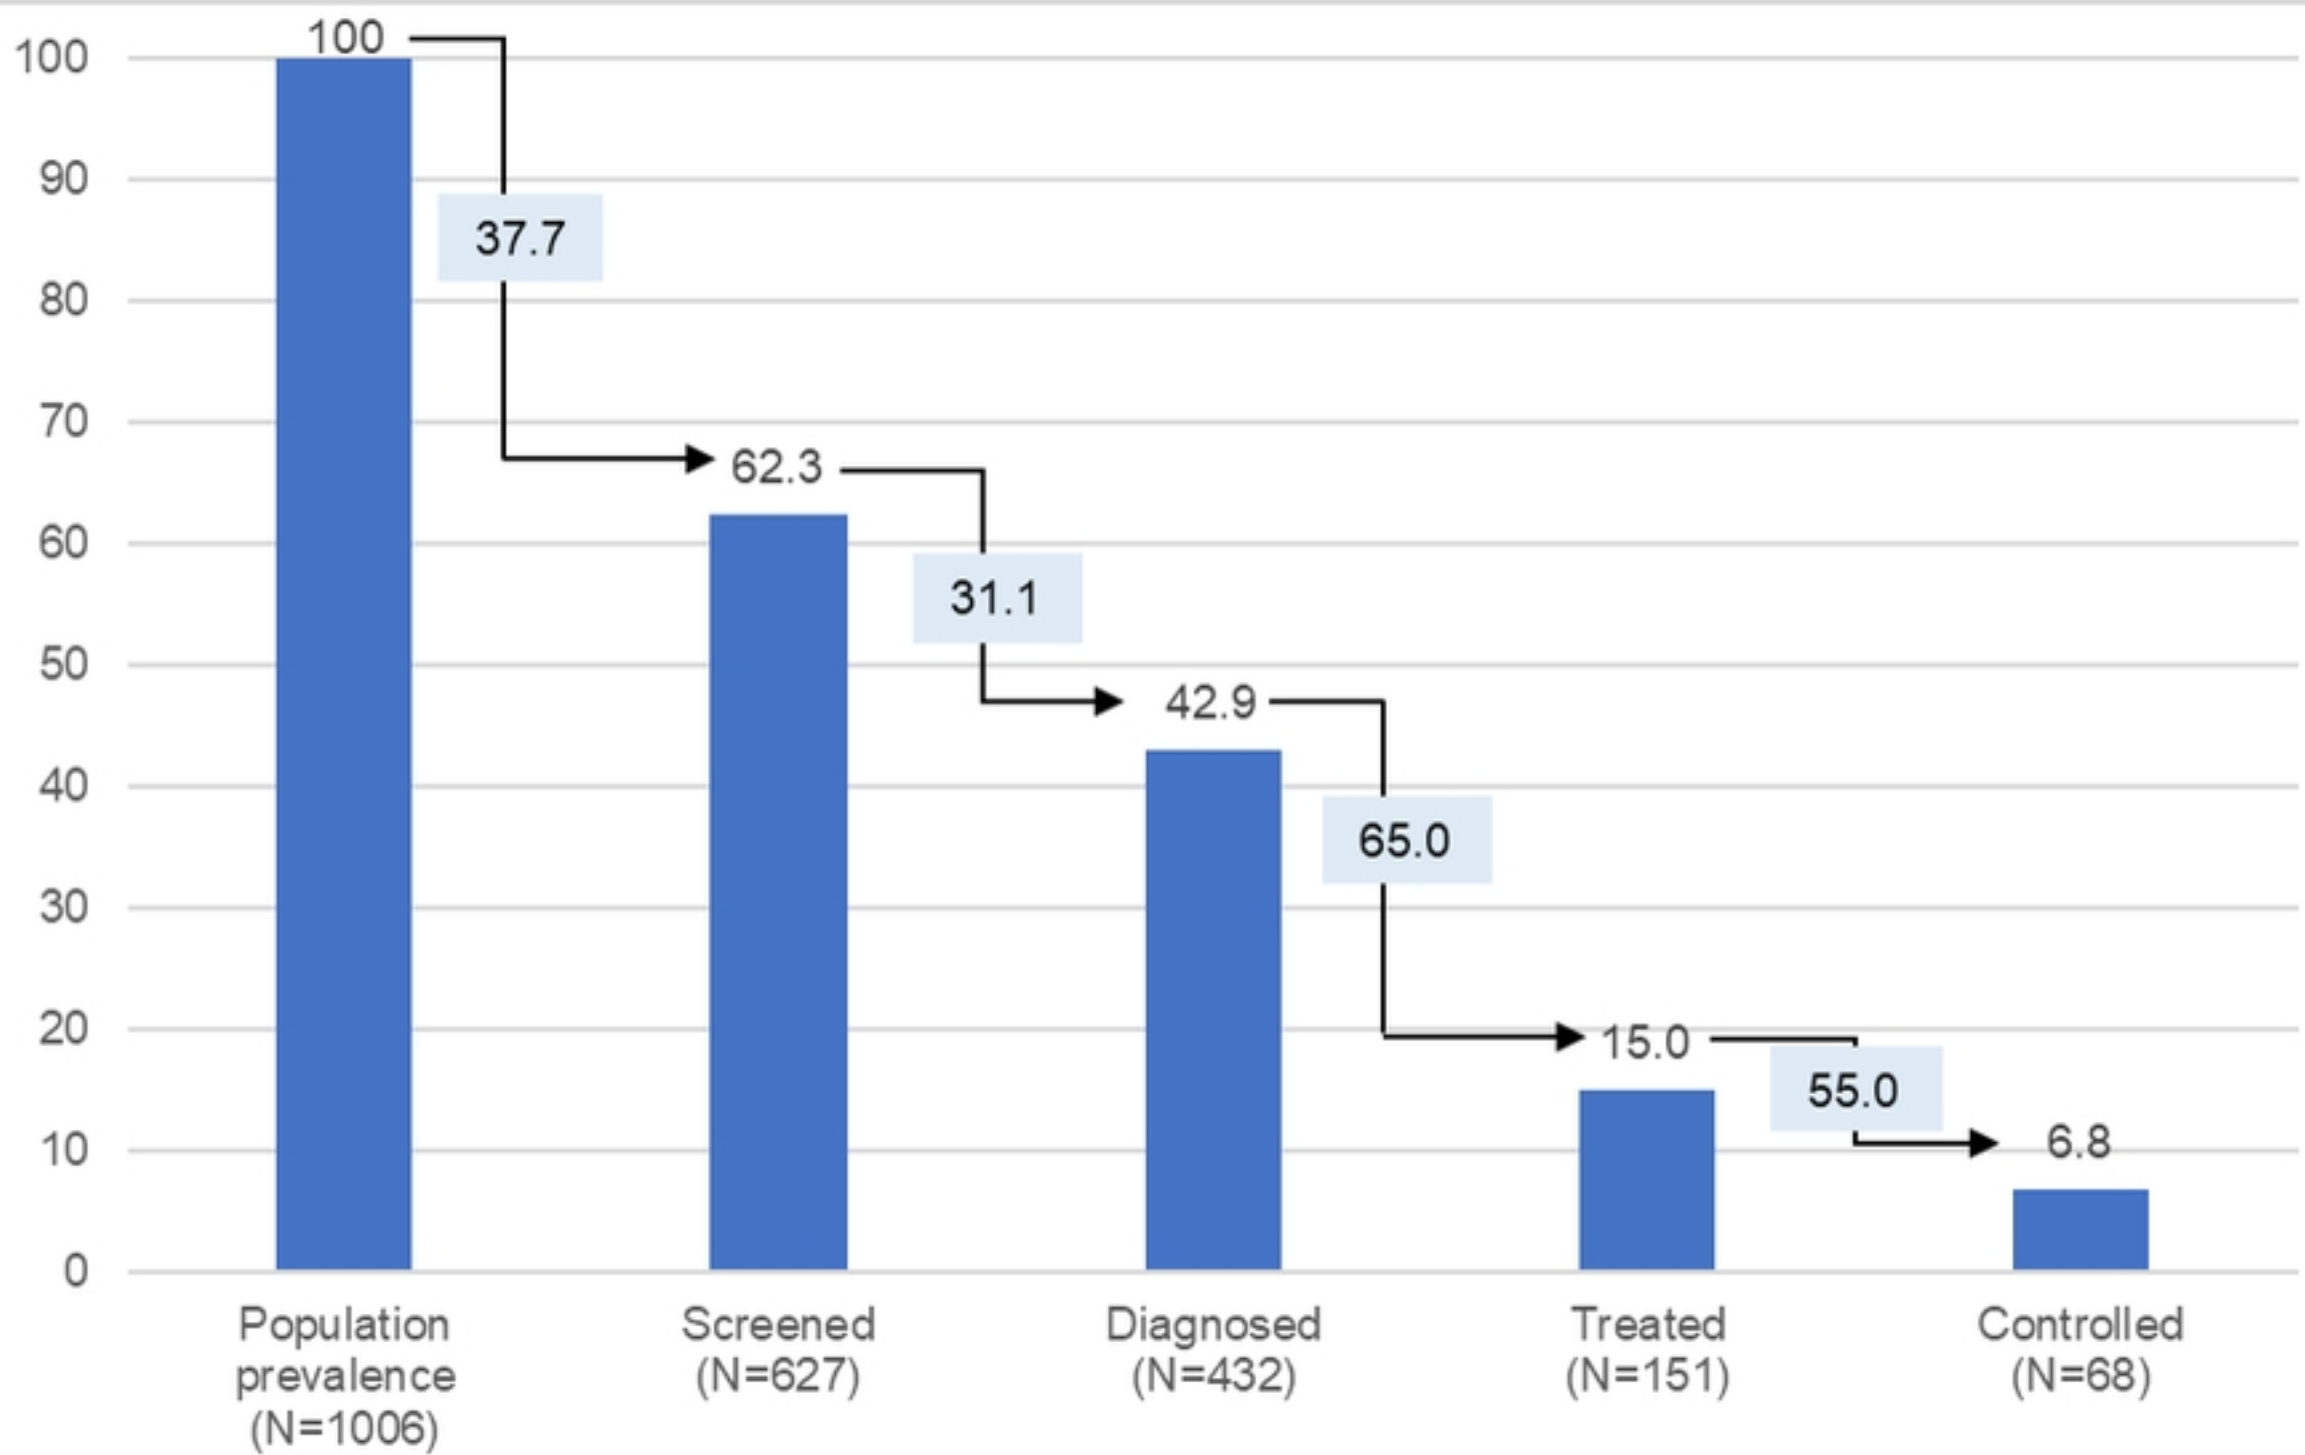

Source: https://medrxiv.org/content/10.1101/2024.04.09.24305568v1.full.pdf
